# Supplementary material
Source: PubMed Central journal article supplement (PMC7063541)
Supplement: jamainternmed-180-728-s002.pdf [file jamainternmed-180-728-s002.pdf]

## Supplementary Online Content

Anton RF, Latham P, Voronin K, et al. Efficacy of gabapentin for the treatment of alcohol use disorder in patients with alcohol withdrawal symptoms: a randomized clinical trial. *JAMA Intern Med*. Published online March 9, 2020. doi:10.1001/jamainternmed.2020.0249

**eFigure.** A) Modified Alcohol Withdrawal Symptom Checklist (Pittman et al. 2007) given to participants prior to randomization and B) number of subjects in each group reporting that symptom.

This supplementary material has been provided by the authors to give readers additional information about their work.

**eFigure.** A) Modified Alcohol Withdrawal Symptom Checklist (Pittman et al. 2007) given to participants prior to randomization and B) number of subjects in each group reporting that symptom.

**A)** Question: Please think about the following symptoms that people sometimes experience when they have stopped, or cut down, on their alcohol consumption. How bothered have you been by this symptom in the PAST 2 Weeks when you were trying to cut down or stop drinking.

- 5 point scale:

0 – not at all

1 – light

2 – Moderate

3 – Significant

4 - Extreme

**B)** Number of Subjects with Self-Reported Alcohol Withdrawal Symptoms (AWS) In the Last Two Weeks. No significant differences between medication groups.

| Symptom List          | Gabapentin (n=44) | Placebo (n=46) |
|-----------------------|-------------------|----------------|
| Nervousness           | 36                | 36             |
| Sweating              | 35                | 30             |
| Tremor                | 27                | 20             |
| Nausea                | 20                | 15             |
| Vomiting              | 12                | 9              |
| Seizures              | 0                 | 0              |
| Hallucinations        | 1                 | 0              |
| Confusion             | 17                | 16             |
| Chills or feeling hot | 27                | 30             |
| Headache              | 25                | 24             |
| Sleep Disturbance     | 39                | 43             |

Items removed from the original AWSC scale were: Abdominal pain, Craving for Alcohol, Depression, Asthenia
