# Supplementary material
Source: PubMed Central journal article supplement (PMC7063541)
Supplement: jamainternmed-180-728-s003.pdf [file jamainternmed-180-728-s003.pdf]

## Data Sharing Statement

Anton. Efficacy of Gabapentin for the Treatment of Alcohol Use Disorder in Patients With Alcohol Withdrawal Symptoms. *JAMA Intern Med*. Published March 09, 2020. 10.1001/jamainternmed.2020.0249

### Data

**Data available:** No

### Additional Information

**Explanation for why data not available:** This is a federally funded study and there are no final resources to prepare a publicly acceptable/accessible data set. This study was started prior to the new NIH rule on data sharing.
